# Supplementary material for: Night Shift Work, DNA Methylation and Telomere Length: An Investigation on Hospital Female Nurses
Source: MDPI journal article supplement (doi:10.3390/ijerph16132292), 2019-06-28
Supplement: s1 [file s1]

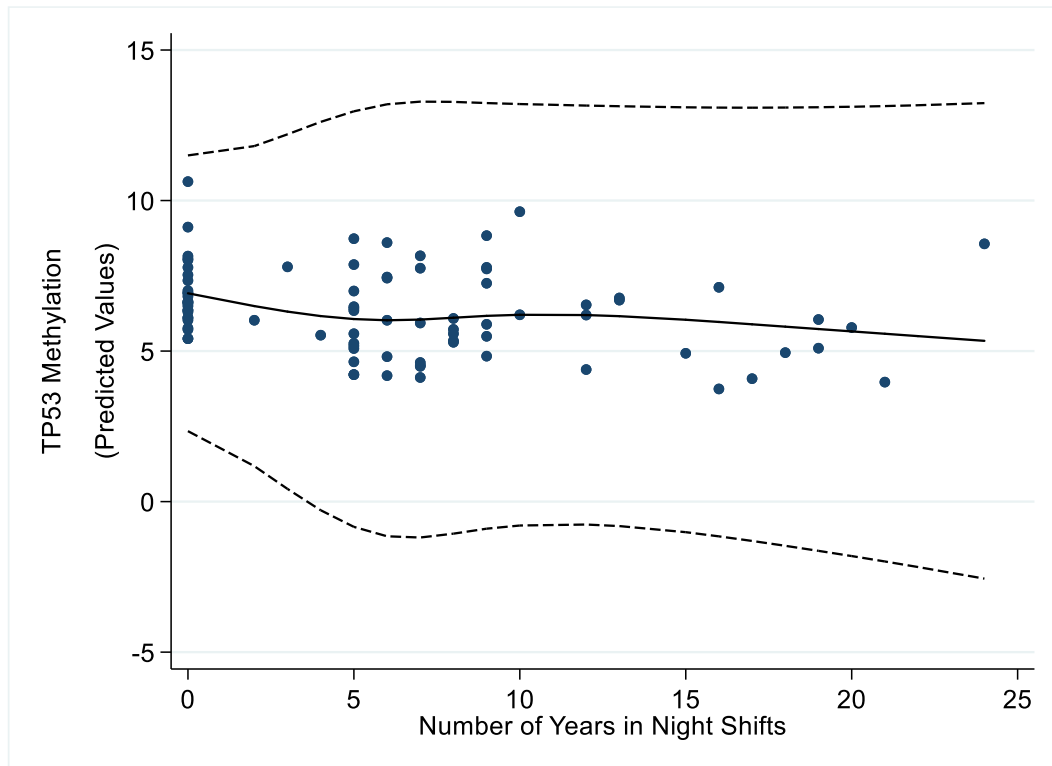

**Figure S1.** Association\* between number of years in night shifts and *TP53* methylation.

\* Number of years in night shifts modeled as a restricted cubic spline with four knots at values 0, 6, 9, 17; other variables in the model include ever/never night shift, age, BMI, smoking habit, oral contraceptive use, and an interaction term between parity and marital status/age at marriage.

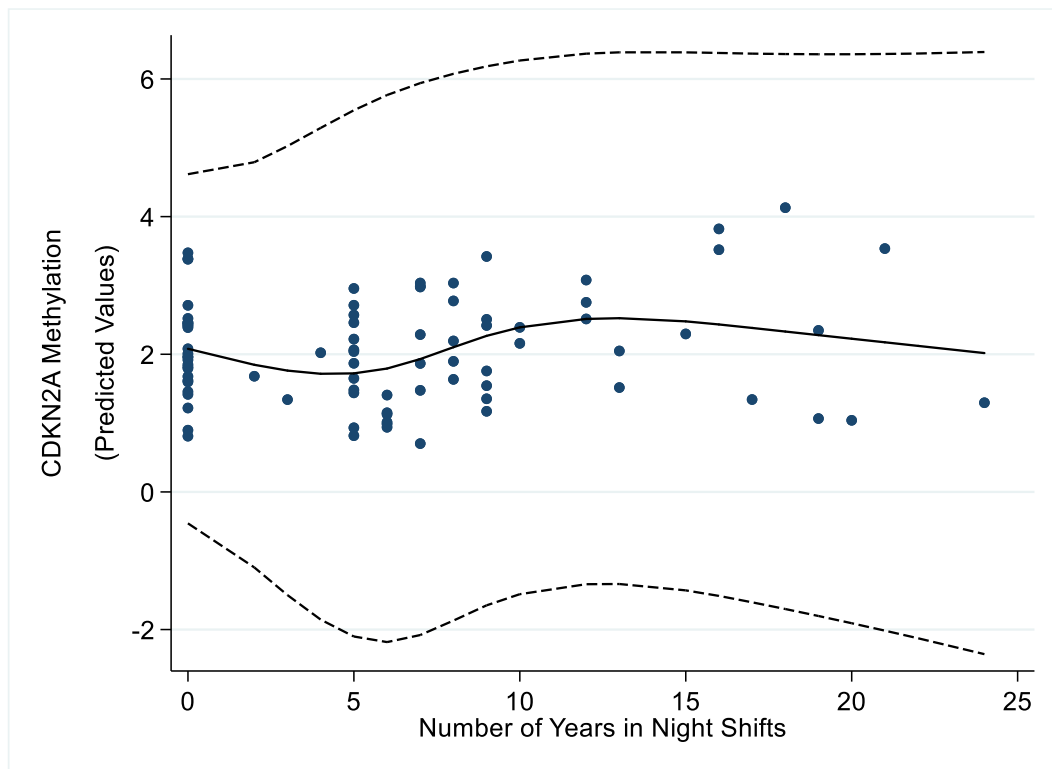

**Figure S2.** Association\* between number of years in night shifts and *CDKN2A* methylation.

\* Number of years in night shifts modeled as a restricted cubic spline with four knots at values 0, 6, 9, 17; other variables in the model include ever/never night shift, age, BMI, smoking habit, oral contraceptive use, and an interaction term between parity and marital status/age at marriage.

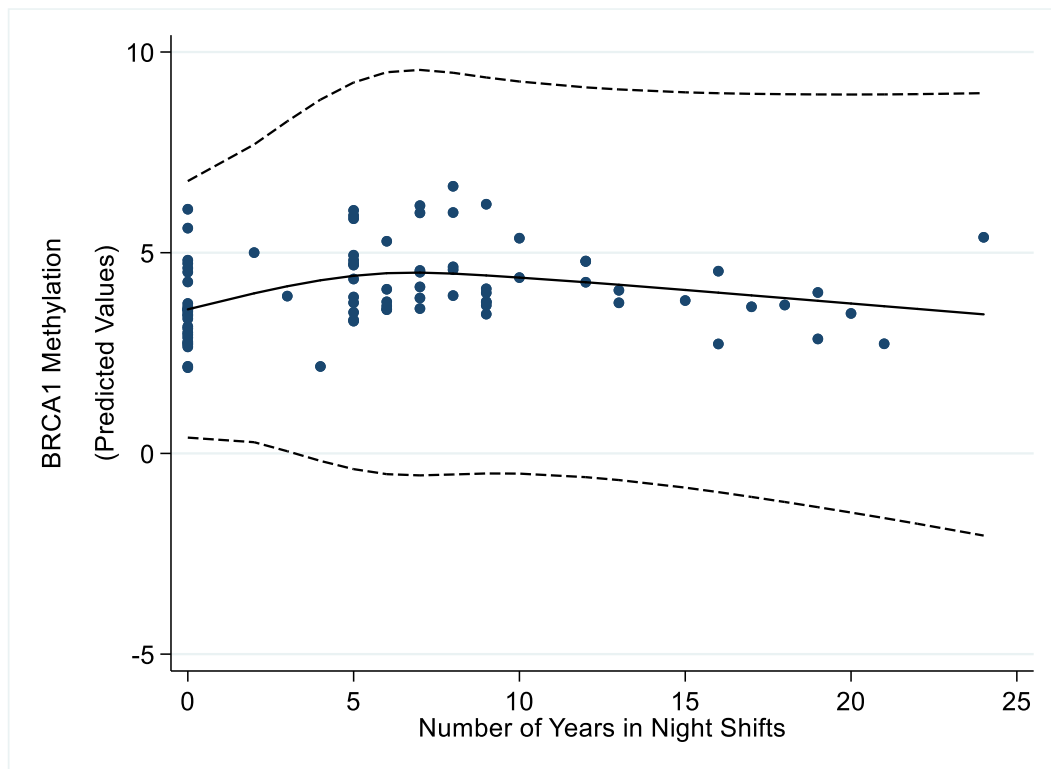

**Figure S3.** Association\* between number of years in night shifts and *BRCA1* methylation.

\* Number of years in night shifts modeled as a restricted cubic spline with four knots at values 0, 6, 9, 17; other variables in the model include ever/never night shift, age, BMI, smoking habit, oral contraceptive use, and an interaction term between parity and marital status/age at marriage.

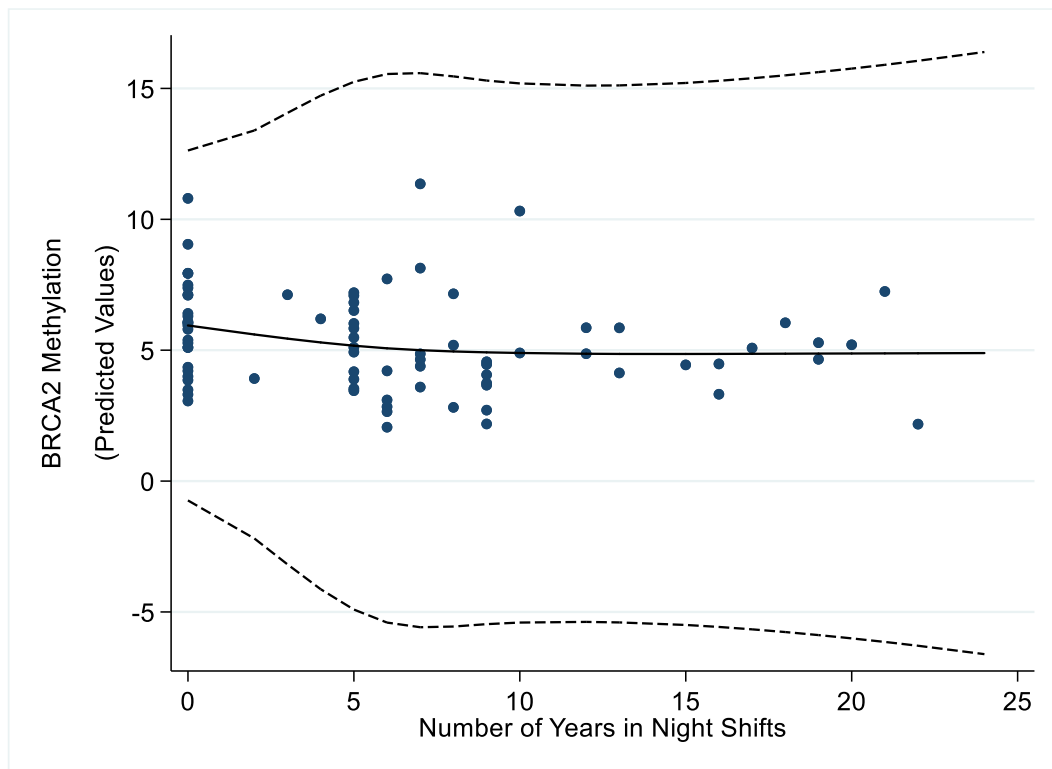

**Figure S4.** Association\* between number of years in night shifts and *BRCA2* methylation.

\* Number of years in night shifts modeled as a restricted cubic spline with four knots at values 0, 6, 9, 17; other variables in the model include ever/never night shift, age, BMI, smoking habit, oral contraceptive use, and an interaction term between parity and marital status/age at marriage.

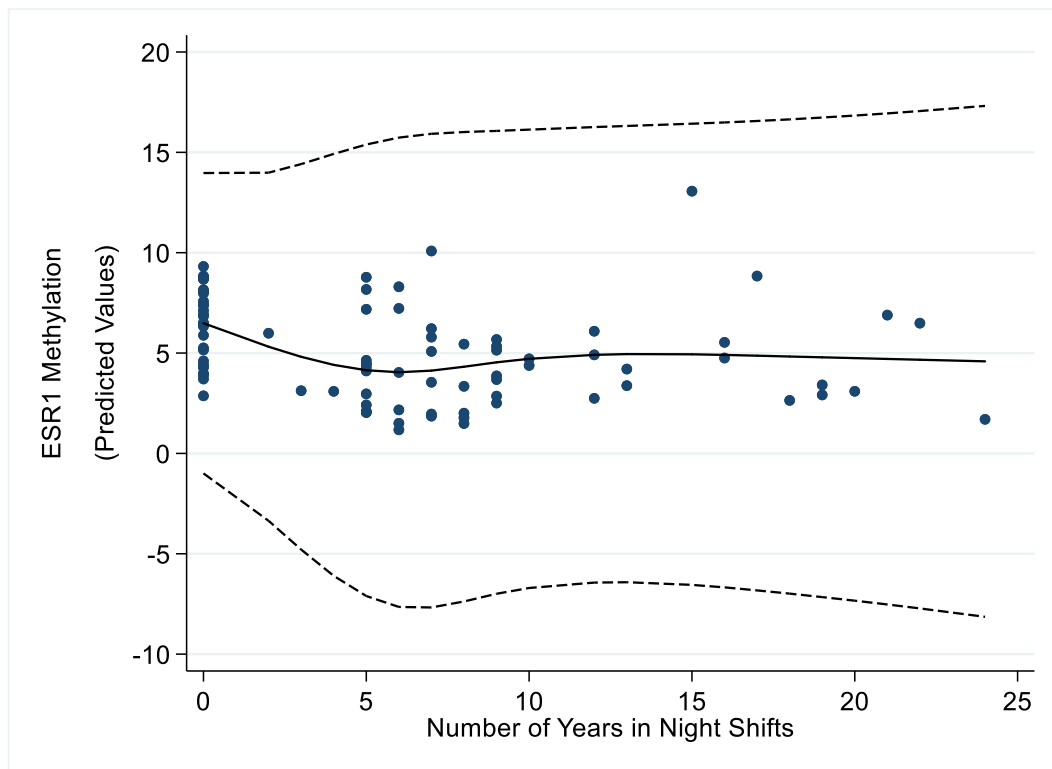

**Figure S5.** Association\* between number of years in night shifts and *ESR1* methylation.

\* Number of years in night shifts modeled as a restricted cubic spline with four knots at values 0, 6, 9, 17; other variables in the model include ever/never night shift, age, BMI, smoking habit, oral contraceptive use, and an interaction term between parity and marital status/age at marriage.

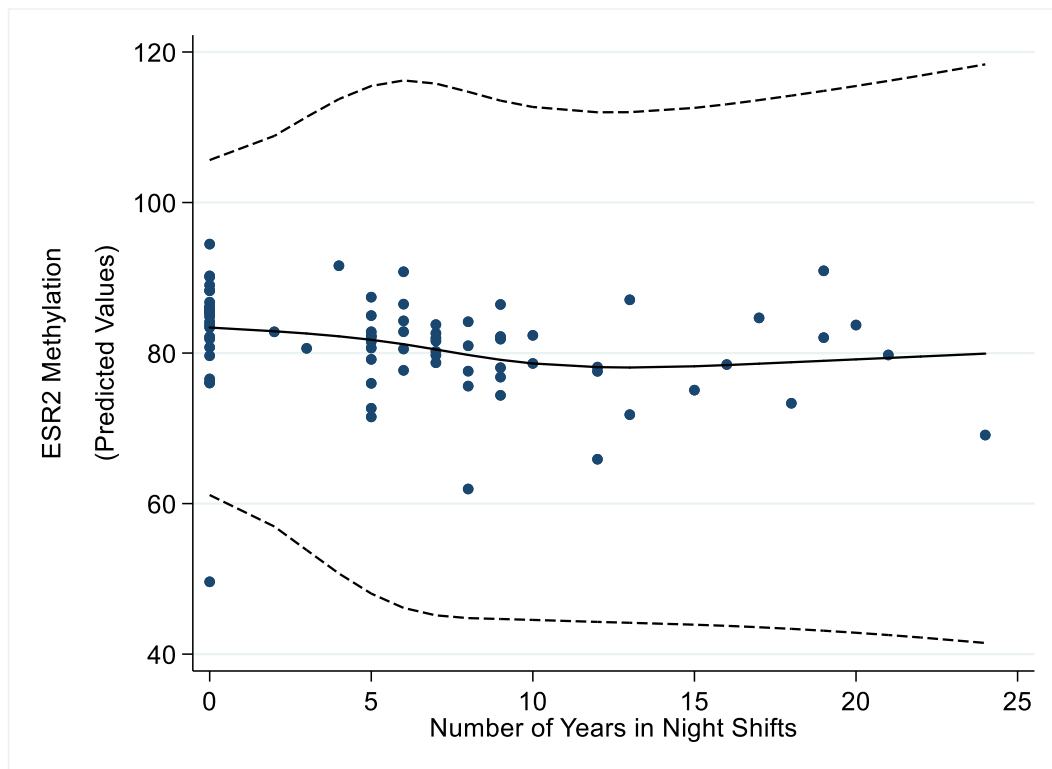

**Figure S6.** Association\* between number of years in night shifts and *ESR2* methylation.

\* Number of years in night shifts modeled as a restricted cubic spline with four knots at values 0, 6, 9, 17; other variables in the model include ever/never night shift, age, BMI, smoking habit, oral contraceptive use, and an interaction term between parity and marital status/age at marriage.

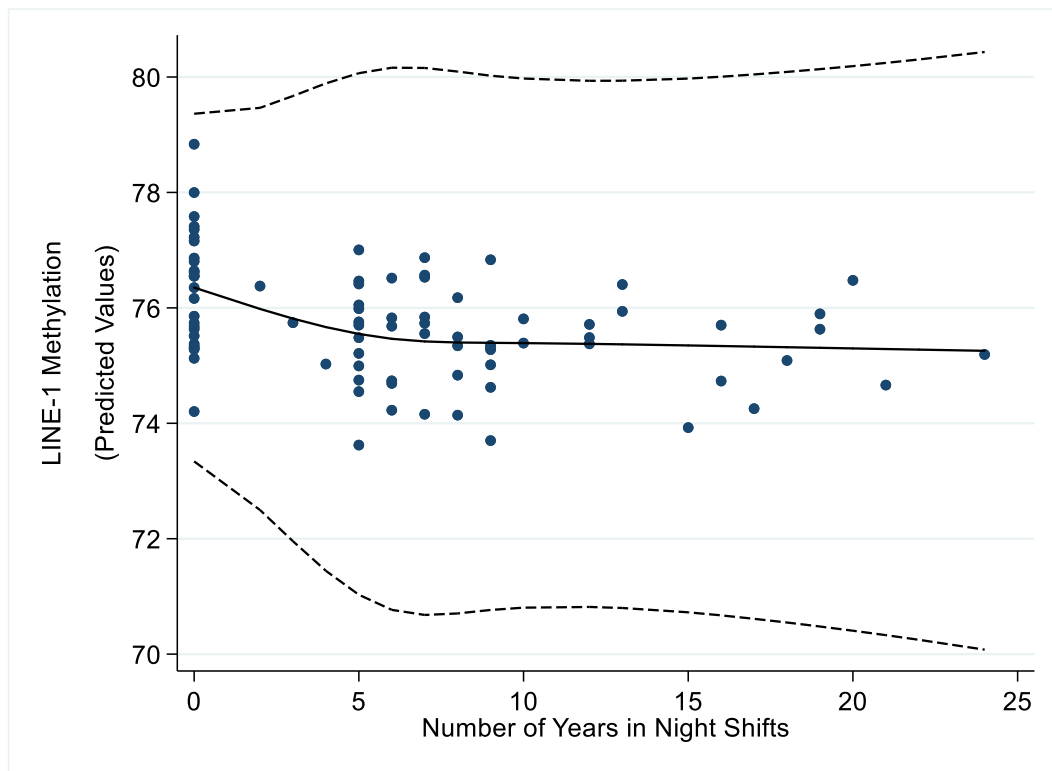

**Figure S7.** Association\* between number of years in night shifts and *LINE-1* methylation.

\* Number of years in night shifts modeled as a restricted cubic spline with four knots at values 0, 6, 9, 17; other variables in the model include ever/never night shift, age, BMI, smoking habit, oral contraceptive use, and an interaction term between parity and marital status/age at marriage.

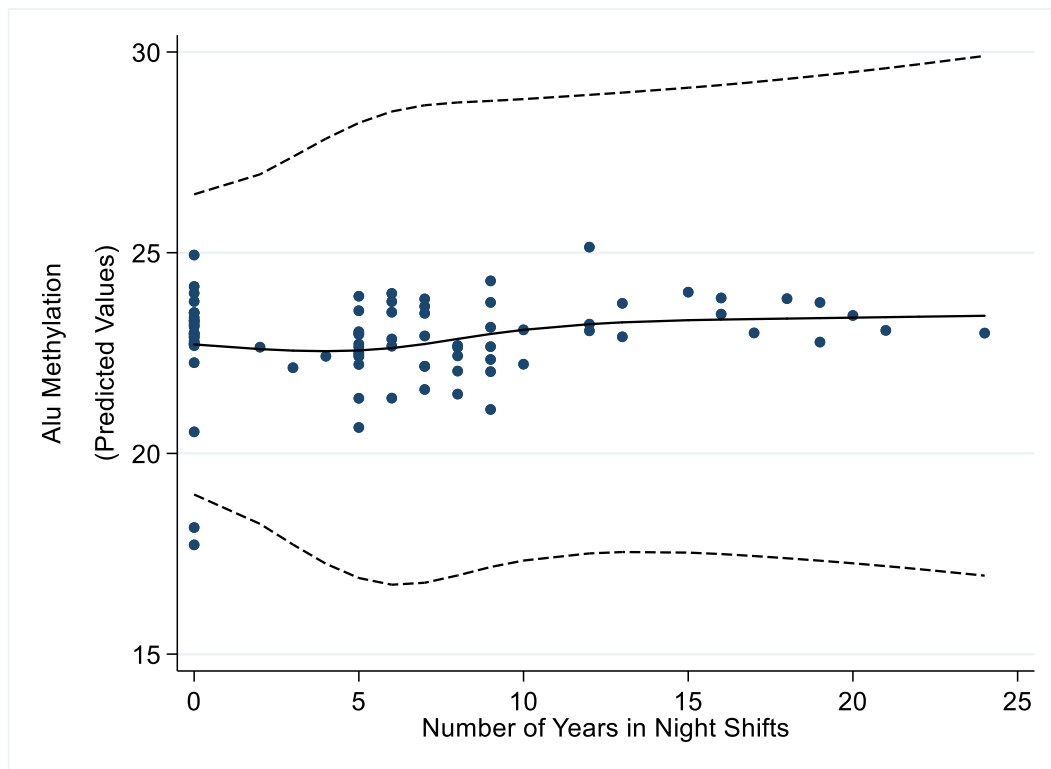

**Figure S8.** Association\* between number of years in night shifts and *Alu* methylation.

\* Number of years in night shifts modeled as a restricted cubic spline with four knots at values 0, 6, 9, 17; other variables in the model include ever/never night shift, age, BMI, smoking habit, oral contraceptive use, and an interaction term between parity and marital status/age at marriage.



**Table S1.** Primer sequences and polymerase chain reaction (PCR) conditions for DNA methylation analysis.

| Genes         | Forward primer (5' to 3')         | Reverse primer (5' to 3')            | Sequencing primer (5' to 3') | PCR conditions |
|---------------|-----------------------------------|--------------------------------------|------------------------------|----------------|
|               |                                   |                                      |                              | 95°C for 60s,  |
| <i>TP53</i>   | Biotin-TTAGGAGTTTATTTAATTTAGGGAAG | TATCCAAC TTTATACCAAAAACCTC           | TCCAAAAAACAATAACTACTAAACTC   | 57°C for 60s,  |
|               |                                   |                                      |                              | 72°C for 60s   |
|               |                                   |                                      |                              | 95°C for 30s,  |
| <i>CDKN2A</i> | AGGGGTTGGTTGGTTATTAG              | BIO- CTACCTACTCTCCCCCTCTC            | GGTTGGTTATTAGAGGGT           | 58°C for 40s,  |
|               |                                   |                                      |                              | 72°C for 30s   |
|               |                                   |                                      |                              | 95°C for 30s,  |
| <i>BRCA1</i>  | ATTTAGAGTAGAGGGTGAAGG             | Biotin-TCTATCCCTCCCATCCTCTAATT       | TTGAGAAATTTTATAGTTTGTTTT     | 54°C for 45s,  |
|               |                                   |                                      |                              | 72°C for 45s   |
|               |                                   |                                      |                              | 95°C for 30s,  |
| <i>BRCA2</i>  | GTTGGGATGTTTGATAAGGAATTT          | Biotin- ATCACAAATCTATCCCCTCAC        | GTTATATTGAGAAATATT           | 55°C for 30s,  |
|               |                                   |                                      |                              | 72°C for 30s   |
|               |                                   |                                      |                              | 95°C for 30s,  |
| <i>ESR1</i>   | GTAGTTTAAGATTTTTTTGGAG            | Biotin-<br>CCAAATAATAAAACACCTACTAACC | ATTGGATAGTAGTAAGTT           | 48°C for 30s,  |
|               |                                   |                                      |                              | 72°C for 30s   |
|               |                                   |                                      |                              | 95°C for 30s,  |
| <i>ESR2</i>   | GTGTTGTGGTTAATATTGGGTAT           | Biotin-CACCAAAAAC TCTTTTAAAATTCC     | TTTTTTTTTAGTGTTTAT           | 60°C for 30s,  |
|               |                                   |                                      |                              | 72°C for 30s   |
|               |                                   |                                      |                              | 95°C for 30s,  |
| <i>LINE-1</i> | TTTTGAGTTAGGTGTGGGATATA           | Biotin-AAAATCAAAAAATTCCCTTTC         | AGTTAGGTGTGGGATATAGT         | 50°C for 30s,  |
|               |                                   |                                      |                              | 72°C for 30s   |

|                                                                                                   |                               |                      |                     |               |
|---------------------------------------------------------------------------------------------------|-------------------------------|----------------------|---------------------|---------------|
|                                                                                                   |                               |                      |                     | 96°C for 90s, |
| <i>Alu</i>                                                                                        | Biotin-TTTTATTAAAAATATAAAAATT | CCCAAACATAAATACAATAA | AATAACTAAAATTACAAAC | 43°C for 60s, |
|                                                                                                   |                               |                      |                     | 72°C for 120s |
| Forty-five cycles were performed for all PCR protocols except for the <i>Alu</i> one (40 cycles). |                               |                      |                     |               |

**Table S2.** Analyzed CpG islands on gene promoters.

| Genes         | Chromosome | Amplicon<br>start | Amplicon<br>end | CpGs<br>(position)                                                                           | Assembly |
|---------------|------------|-------------------|-----------------|----------------------------------------------------------------------------------------------|----------|
| <i>TP53</i>   | 17         | 7531409           | 7531628         | 7531486 7531473 7531469<br>7531458                                                           | hg17     |
| <i>CDKN2A</i> | 9          | 21965321          | 21965395        | 21965350<br>21965355<br>21965357<br>21965361<br>21965365<br>21965368<br>21965374             | hg19     |
| <i>BRCA1</i>  | 17         | 41277339          | 41277523        | 41277364<br>41277381<br>41277389<br>41277392<br>41277394                                     | hg19     |
| <i>BRCA2</i>  | 13         | 32889486          | 32889749        | 32889561<br>32889570<br>32889579<br>32889584<br>32889586<br>32889591<br>32889594<br>32889599 | hg19     |
| <i>ESR1</i>   | 6          | 152129135         | 152129444       | 152129194<br>152129197<br>152129212<br>152129219<br>152129221                                | hg19     |
| <i>ESR2</i>   | 14         | 64749381          | 64749472        | 64749426<br>64749448                                                                         | hg19     |

**Table S3.** Summary statistics for methylation (%) of specific genes and repetitive elements, and telomere length (T/S).

| <b>Biological Markers</b> | <b>Number of Observations</b> | <b>Mean</b> | <b>Standard Deviation</b> | <b>Minimum</b> | <b>Maximum</b> |
|---------------------------|-------------------------------|-------------|---------------------------|----------------|----------------|
| <i>TP53</i>               | 94                            | 6.28        | 1.49                      | 3.28           | 10.89          |
| <i>CDKN2A</i>             | 94                            | 2.04        | 0.90                      | 0.84           | 5.11           |
| <i>BRCA1</i>              | 94                            | 4.08        | 1.15                      | 2.28           | 7.69           |
| <i>BRCA2</i>              | 89                            | 5.26        | 2.00                      | 2.35           | 11.91          |
| <i>ESR1</i>               | 95                            | 5.04        | 2.38                      | 1.40           | 13.00          |
| <i>ESR2</i>               | 91                            | 81.23       | 7.14                      | 46.87          | 91.95          |
| <i>LINE-1</i>             | 93                            | 75.71       | 0.99                      | 73.34          | 78.47          |
| <i>Alu</i>                | 93                            | 22.83       | 1.34                      | 15.58          | 24.73          |
| Telomere length           | 95                            | 0.79        | 0.26                      | 0.05           | 1.90           |

**Table S4.** Association between number of years in night shifts and gene-specific methylation, methylation of repetitive elements, and telomere length, according to duration of work in night shifts (< 12 vs. ≥ 12 years).

| Biological Markers | < 12 years in night shifts |                 |          | ≥ 12 years in night shifts |                 |          |
|--------------------|----------------------------|-----------------|----------|----------------------------|-----------------|----------|
|                    | $\beta^*$                  | (95%CI)         | <i>p</i> | $\beta^*$                  | (95%CI)         | <i>p</i> |
| <i>TP53</i>        | 0.03                       | (-0.20 ; 0.25)  | 0.82     | -0.07                      | (-0.27 ; 0.13)  | 0.51     |
| <i>CDKN2A</i>      | 0.12                       | (-0.004 ; 0.24) | 0.06     | -0.03                      | (-0.14 ; 0.09)  | 0.63     |
| <i>BRCA1</i>       | 0.01                       | (-0.14 ; 0.17)  | 0.88     | -0.08                      | (-0.23 ; 0.06)  | 0.24     |
| <i>BRCA2</i>       | -0.05                      | (-0.40 ; 0.30)  | 0.77     | -0.004                     | (-0.32 ; 0.31)  | 0.98     |
| <i>ESR1</i>        | 0.06                       | (-0.31 ; 0.42)  | 0.75     | 0.02                       | (-0.29 ; 0.33)  | 0.90     |
| <i>ESR2</i>        | -0.66                      | (-1.74 ; 0.42)  | 0.23     | 0.17                       | (-0.81 ; 1.14)  | 0.73     |
| <i>LINE-1</i>      | -0.04                      | (-0.19 ; 0.11)  | 0.58     | -0.003                     | (-0.14 ; 0.13)  | 0.97     |
| <i>Alu</i>         | 0.10                       | (-0.08 ; 0.28)  | 0.29     | 0.02                       | (-0.14 ; 0.19)  | 0.79     |
| <b>TL</b>          | 0.06                       | (0.03 ; 0.09)   | < 0.001  | -0.07                      | (-0.10 ; -0.04) | < 0.001  |

*TL: telomere length. \* Number of years in night shifts modeled as linear spline allowing the slope of the function to change at 12 years; other variables in the model include ever/never night shift, age, BMI, smoking habit, oral contraceptive use, and an interaction term between parity and marital status/age at marriage.*
